# Supplementary material for: Parents' presence and parent–infant closeness in 11 neonatal intensive care units in six European countries vary between and within the countries
Source: PubMed Central journal article supplement — Acta Paediatr. 2017 Mar 31;106(6):878–88. doi: 10.1111/apa.13798 (PMC5434801; doi:10.1111/apa.13798), 2017-03-31
Supplement: APA-106-878-s001.pdf [file APA-106-878-s001.pdf]

**Supplemental Table S1 Infant-Parent Characteristic**

|                                           |             | Finland           | Sweden                         |                   |                   | Estonia             |                   | Italy                                  | Spain             | Norway                     |                   |                   |         |
|-------------------------------------------|-------------|-------------------|--------------------------------|-------------------|-------------------|---------------------|-------------------|----------------------------------------|-------------------|----------------------------|-------------------|-------------------|---------|
|                                           |             | Turku             | Uppsala                        | Danderyd          | Huddinge          | Tallinn             | Tarto             | Como                                   | Madrid            | Drammen                    | Bergen            | Tromso            | p-value |
| ID                                        |             | 11                | 12                             | 13                | 15                | 16                  | 17                | 19                                     | 20                | 22                         | 23                | 24                |         |
| N                                         | n           | 42                | 31                             | 26                | 21                | 36                  | 35                | 32                                     | 39                | 34                         | 31                | 12                |         |
| <b>Infant characteristics</b>             |             |                   |                                |                   |                   |                     |                   |                                        |                   |                            |                   |                   |         |
| pna at study entry                        | med(q1,q3)  | 3 (2,4)           | 4 (3,5)                        | 5 (3,8)           | 3 (2,5;5)         | 3 (2,75;4,25)       | 2 (1,3)           | 3 (2,4)                                | 4 (3,5)           | 3 (1,5)                    | 3 (2,5)           | 5 (5,10)          |         |
| gestational age                           | med (q1,q3) | 32.3 (29.9, 34.1) | 28.4 (25.0, 31.4)              | 33.7 (32.4, 34.4) | 32.4 (30.9, 34.6) | 33.3 (31.9, 34.2)   | 33.3 (31.9, 34.2) | 32.3 (31.4, 33.0)                      | 31.3 (28.7, 33.3) | 33.3 (31.9, 34.1)          | 31.6 (28.0, 33.6) | 32.1 (30.0, 34.6) | <0.0001 |
| birth weight (g)                          | med (q1,q3) | 1770 (1200, 2115) | 1135 (654, 1763)               | 2032 (1748, 2234) | 1707 (1343, 2290) | 1980 (1712, 2336)   | 1974 (1410, 2222) | 1548 (1070, 1760)                      | 1450 (1090, 1800) | 1962 (1718, 2180)          | 1590 (1200, 2100) | 1563 (1242, 2207) | <0.0001 |
| birth length (cm)                         | med (q1,q3) | 42.0 (40.0, 44.0) | 36.0 (30.5, 42.0)              | 44.0 (41.0, 45.0) | 41.0 (38.0, 45.0) | 44.0 (41.0, 46.0)   | 42.0 (40.0, 45.0) | 41.0 (36.8, 43.5)                      | 40.0 (36.0, 43.5) | 43.0 (40.5, 44.0)          | 41.0 (38.0, 45.0) | 41.0 (37.5, 45.0) |         |
| birth head circumference (cm)             | med (q1,q3) | 29.9 (27.0, 31.5) | 25.5 (22.0, 30.0)              | 31.0 (29.5, 32.5) | 30.5 (29.1, 32.5) | 31.0 (29.5, 32.0)   | 31.0 (29.0, 32.0) | 29.0 (27.0, 30.0)                      | 28.5 (26.0, 30.5) | 31.0 (29.2, 32.0)          | 29.0 (27.0, 31.0) | 28.8 (27.3, 31.5) |         |
| Sex, female                               | n           | 17                | 14                             | 12                | 12                | 27                  | 20                | 15                                     | 23                | 17                         | 17                | 5                 | 0.2779  |
| delivery, vaginal                         | n           | 16                | 19                             | 12                | 7                 | 20                  | 19                | 5                                      | 15                | 14                         | 22                | 3                 | 0.0028  |
| twins                                     | n           | 23                | 6                              | 2                 | 10                | 12                  | 10                | 12                                     | 16                | 10                         | 2                 | 2                 | 0.0016  |
| incubator, yes                            | n           | 14                | 14                             | 3                 | 10                | 31                  | 30                | 27                                     | 35                | 9                          | 14                | 3                 | <0.0001 |
| <b>Parent characteristics</b>             |             |                   |                                |                   |                   |                     |                   |                                        |                   |                            |                   |                   |         |
| mother's age                              | med (q1,q3) | 31.0 (29.0, 34.0) | 32.5(28.0, 36.0)               | 33.0 (29.0, 36.0) | 33.0 (30.0, 36.0) | 31.0 (28.5, 33.0)   | 31.0 (26.0, 34.0) | 35.5 (31.5, 38.0)                      | 36.0 (33.0, 39.0) | 32.5 (30.0, 40.0)          | 32.0 (28.0, 34.0) | 32.0 (28.0, 41.0) | 0.0006  |
| father's age                              | med (q1,q3) | 32.0 (29.5, 34.5) | 31.5 (30.0, 37.0)              | 35.0 (31.0, 37.0) | 34.0 (30.0, 38.0) | 34.0 (30.0, 37.0)   | 32.5 (30.0, 38.0) | 36.5 (34.0, 41.5)                      | 35.0 (33.0, 43.0) | 34.0 (32.0, 39.0)          | 33.0 (30.0, 35.0) | 35.5 (29.0, 43.0) | 0.0002  |
| mother's language non-native              | n           | 10                | 0                              | 3                 | 3                 | 0                   | 0                 | 0                                      | 0                 | 5                          | 6                 | 0                 | 0.0301  |
| father's language non-native              | n           | 6                 | 1                              | 5                 | 5                 | 1                   | 2                 | 0                                      | 2                 | 10                         | 2                 | 0                 | 0.0164  |
| mother's education other than university  | n           | 33                | 12                             | 9                 | 10                | 13                  | 20                | 17                                     | 24                | 7                          | 24                | 3                 | <0.0001 |
| mother's education university             | n           | 5                 | 16                             | 17                | 11                | 23                  | 15                | 12                                     | 15                | 27                         | 7                 | 6                 | <0.0001 |
| father's education other than university  | n           | 34                | 15                             | 17                | 17                | 18                  | 28                | 26                                     | 24                | 10                         | 19                | 4                 | <0.0001 |
| father's education university             | n           | 5                 | 13                             | 4                 | 4                 | 16                  | 6                 | 3                                      | 11                | 23                         | 12                | 2                 | <0.0001 |
| mother's socioeconomic status 1,2,...,5*  | n           | 25, 2, 7, 5, 2    | 24, 0, 1, 1, 3                 | 20, 0, 0, 1, 2    | 18, 0, 0, 1, 2    | 21, 9, 2, 2, 2      | 23, 10, 0, 0, 2   | 28, 2, 1, 0, 1                         | 31, 6, 2, 0, 0    | 31, 1, 1, 0, 1             | 28, 0, 1, 2, 0    | 10, 0, 0, 1, 0    | <0.0001 |
| father's socioeconomic status 1,2,...,4** | n           | 35, 4, 0, 1       | 24, 0, 1, 4                    | 23, 0, 0, 3       | 20, 1, 0, 0       | 35, 1, 0, 0         | 30, 0, 0, 4       | 27, 0, 0, 4                            | 30, 5, 0, 1       | 32, 1, 0, 0                | 30, 0, 1, 0       | 9, 0, 1, 0        | 0.0019  |
| time to home <30                          | n           | 25                | 17                             | 21                | 10                | 22                  | 17                | 17                                     | 35                | 20                         | 20                | 7                 | 0.0106  |
| time to home 30-60                        | n           | 3                 | 1                              | 4                 | 5                 | 5                   | 6                 | 12                                     | 4                 | 13                         | 3                 | 0                 | 0.0106  |
| time to home >60                          | n           | 14                | 13                             | 1                 | 4                 | 9                   | 12                | 0                                      | 0                 | 1                          | 8                 | 4                 | 0.0106  |
| siblings, yes                             | n           | 24                | 17                             | 10                | 13                | 19                  | 18                | 8                                      | 11                | 22                         | 15                | 5                 | 0.0299  |
| mother's prev. child in a NICU            | n           | 7                 | 6                              | 2                 | 2                 | 7                   | 3                 | 2                                      | 4                 | 4                          | 3                 | 2                 | 0.6354  |
| father's prev. child in a NICU            | n           | 6                 | 6                              | 1                 | 2                 | 7                   | 3                 | 2                                      | 4                 | 2                          | 3                 | 0                 | 0.5456  |
| car, yes                                  | n           | 41                | 27                             | 24                | 19                | 31                  | 32                | 31                                     | 31                | 34                         | 30                | 8                 | 0.1504  |
| parents living together, yes              | n           | 37                | 30                             | 26                | 21                | 36                  | 31                | 31                                     | 33                | 33                         | 31                | 9                 | 0.004   |
| mother smoking, yes                       | n           | 0                 | 0                              | 1                 | 2                 | 2                   | 3                 | 3                                      | 11                | 0                          | 0                 | 2                 | 0.0162  |
| father smoking, yes                       | n           | 9                 | 0                              | 5                 | 2                 | 10                  | 17                | 11                                     | 20                | 5                          | 4                 | 1                 | 0.0002  |
| Paid Maternity leave                      |             | 105 days          | 60 days (sick child allowance) |                   |                   | 140 days            |                   | 5 month (80% salary, compulsory leave) | 16+2 weeks        | 13 weeks                   |                   |                   |         |
| Paid Paternity leave                      |             | 54 days           | 60 days (sick child allowance) |                   |                   | 10 days             |                   | right to be away from work             | 2 weeks           | 10 weeks                   |                   |                   |         |
| Paid Parental leave                       |             | +158 days         | 480 days (80 weeks)            |                   |                   | 435 days (62 weeks) |                   |                                        |                   | 26 weeks 100% 36 weeks 80% |                   |                   |         |

\* 1=paid work, 2=home-maker, 3=unemployed, 4=student, 5=other, \*\* 1=paid work, 2=unemployed, 3=student, 4=other
